# Supplementary material for: Zebrafish TRIM25 Promotes Innate Immune Response to RGNNV Infection by Targeting 2CARD and RD Regions of RIG-I for K63-Linked Ubiquitination
Source: PubMed Central journal article supplement (PMC6901795; doi:10.3389/fimmu.2019.02805), 2019-12-03
Supplement: Data_Sheet_1.pdf [file Data_Sheet_1.pdf]

## *Supplementary Material*

### **1 Supplementary Tables**

#### **Table S1. Primers used in this study**

| Primer name                           | Sequences (5'-3')                     | Comment                             |
|---------------------------------------|---------------------------------------|-------------------------------------|
| 18s rRNA-F                            | TCGCTAGTTGGCATCGTTTATG                | QPCR of 18s rRNA                    |
| 18s rRNA-R                            | CGGAGGTTCTGAAGACGATCA                 | QPCR of 18s rRNA                    |
| NNV-RDRP-F                            | GCTTTATGCGTGAGTGCGTC                  | QPCR of RDRP                        |
| NNV-RDRP-R                            | GCTGTTCCGCTCTGTTGTGAG                 | QPCR of RDRP                        |
| zbTRIM25-Myc-XhoI-F                   | CCGCTCGAGGTGCGGAACAAATGTCTCTG         | pCMV-Myc-zbTRIM25                   |
| zbTRIM25-Myc-NotI-R                   | ATAAGAATGCGGCCGCAAACAGAGCAAG<br>TCTTT | pCMV-Myc-zbTRIM25                   |
| zbTRIM25-Flag-XhoI-F                  | CCGCTCGAGGTGCGGAACAAATGTCTCTG         | pCMV-Flag-zbTRIM25                  |
| zbTRIM25-Flag-NotI-R                  | ATAAGAATGCGGCCGCAAACAGAGCAAG<br>TCTTT | pCMV-Flag-zbTRIM25                  |
| zbRIG-I-Myc-EcoRI-F                   | GGAATTCGGTACGAGCTGGAGAAGGA            | pCMV-Myc-zbRIG-I                    |
| zbRIG-I-Myc-KpnI-R                    | GGGGTACCTCAGTTGACCAGCGCCCA            | pCMV-Myc-zbRIG-I                    |
| zbRIG-I-Flag-EcoRI-F                  | GGAATTCGGTACGAGCTGGAGAAGGA            | pCMV-Flag-zbRIG-I                   |
| zbRIG-I-Flag-KpnI-R                   | GGGGTACCTCAGTTGACCAGCGCCCA            | pCMV-Flag-zbRIG-I                   |
| zbRIG-I-2CARD-EcoRI-F                 | GGAATTCGGTACGAGCTGGAGAAGGA            | pEGFP-zbRIG-I-2CARD                 |
| zbRIG-I-2CARD-KpnI-R                  | GGGGTACCTCAATCTGTCTCCAGCAGG           | pEGFP-zbRIG-I-2CARD                 |
| zbRIG-I- $\Delta$ 2CARD-EcoRI-F       | GGAATTCGGGGAGCAGGAAAGTCAGTGC          | pEGFP-zbRIG-I- $\Delta$ 2CARD       |
| zbRIG-I- $\Delta$ 2CARD-KpnI-R        | GGGGTACCTCAGTTGACCAGCGCCCA            | pEGFP-zbRIG-I- $\Delta$ 2CARD       |
| zbRIG-I-RD-EcoRI-F                    | GGAATTCTATGAGCTTCAAGTCCTCTGCG         | pEGFP-zbRIG-I-RD                    |
| zbRIG-I-RD-KpnI-R                     | GGGGTACCCTCCGTCATGTCAAACCTCTC         | pEGFP-zbRIG-I-RD                    |
| zbRIG-I- $\Delta$ (2CARDs+RD)-EcoRI-F | GGAATTCTATGGGAGCAGGAAAGTCA            | pEGFP-zbRIG-I- $\Delta$ (2CARDs+RD) |
| zbRIG-I- $\Delta$ (2CARDs+RD)-KpnI-R  | GGGGTACCGTCCTGTGTTTTGGGTTT            | pEGFP-zbRIG-I- $\Delta$ (2CARDs+RD) |
| zbTRIM25-SPRY-XhoI-F                  | CCGCTCGAGGTTTTGATGTCAGAACGGCTC<br>A   | pCMV-Flag-zbTRIM25-SPRY             |

---

|                                 |                                             |                                   |
|---------------------------------|---------------------------------------------|-----------------------------------|
| zbTRIM25-SPRY-NotI-R            | ATAAGAATGCGGCCGCTCAGCACAGAGAG<br>ACAGAGGAAC | pCMV-Flag-zbTRIM25-SPRY           |
| zbTRIM25- $\Delta$ SPRY-EcoRI-F | GGAATTCTATGTTAACATGCAGCATCTGTTT             | pCMV-Flag-zbTRIM25- $\Delta$ SPRY |
| zbTRIM25- $\Delta$ SPRY-NotI-R  | ATAAGAATGCGGCCGCTCAATGGAGAATAG<br>TGCCGTATT | pCMV-Flag-zbTRIM25- $\Delta$ SPRY |
| zbRIG-I-His-EcoRI-F             | CGGAATTCATGTACGAGCTGGAGAAGGAG               | pET32a-zbRIG-I                    |
| zbRIG-I-His-SalI-R              | ACGCGTCGACGGTT GAC CAG CGC CCA<br>TGT CTC   | pET32a-zbRIG-I                    |
| zbTRIM25-F                      | GACGACCCTGCGAACTATCC                        | QPCR of zbTRIM25                  |
| zbTRIM25-R                      | CCAGCAAGATGCCAACACG                         | QPCR of zbTRIM25                  |
| zbISG15-F                       | AAAACCTGCTTGCGGTGA                          | QPCR of ISG15                     |
| zbISG15-R                       | GGAGTTCAGCCCGTAGCTGC                        | QPCR of ISG15                     |
| zbIFN 1-F                       | GCTCTGCGTCTACTTGCGAA                        | QPCR of IFN 1                     |
| zbIFN 1-R                       | GCGGCTTGAAAATGGTGT                          | QPCR of IFN 1                     |
| zbIRF3-F                        | CAAAACCGCTGTTCTGTGCC                        | QPCR of IRF3                      |
| zbIRF3-R                        | TCGTCGCTGTTGGAGTCCTG                        | QPCR of IRF3                      |
| zbMAVS-F                        | CAGGCGAGAGAACTGGATTG                        | QPCR of MAVS                      |
| zbMAVS-R                        | CAGGTGGCATTAGCAGAGGAA                       | QPCR of MAVS                      |
| zbRIG-I-F                       | CGCCAGTCCTGATAAACCCA                        | QPCR of RIG-I                     |
| zbRIG-I-R                       | GCAGCGGCAGATCCTGTATG                        | QPCR of RIG-I                     |
| zbTRAF3-F                       | ATGTCCGAGGGCGTAAT                           | QPCR of TRAF3                     |
| zbTRAF3-R                       | ACACTCAGTCTGGCGTGGGT                        | QPCR of TRAF3                     |

---
